# Supplementary material for: Distribution of the SARS-CoV-2 Pandemic and Its Monthly Forecast Based on Seasonal Climate Patterns
Source: MDPI journal article supplement (doi:10.3390/ijerph17103493), 2020-05-17
Supplement: s1 [file s1]

Supplementary Files to  
“A proposal for isotherm world maps to forecast the  
seasonal evolution of the SARS-CoV-2 pandemic”  
Int. J. Environ. Res. Public Health, 2020.

Nicola Scafetta

May 16, 2020

Department of Earth Sciences, Environment and Georesources, University of Naples Federico II, Via  
Cinthia 21, 80126, Naples, Italy

Tel.: +39 081-2538348

Email: nicola.scafetta@unina.it

ORCID ID: 0000-0003-0967-1911

The online Supplementary Files provides the full data set analyzed in the paper and the same twelve isotherm maps shown in Figures 8, 9, 10 e 11 shown in the main paper for each month of the year from January to December as Keyhole Markup language Zipped (kmz) files, that is, as Climate Explorer Google-Earth-Pro interactive and zoomable maps.

List of provided files:

- 1\_January Climate Explorer map.kmz
- 2\_February Climate Explorer map.kmz
- 3\_March Climate Explorer map.kmz
- 4\_April Climate Explorer map.kmz
- 5\_May Climate Explorer map.kmz
- 6\_June Climate Explorer map.kmz
- 7\_July Climate Explorer map.kmz
- 8\_August Climate Explorer map.kmz
- 9\_September Climate Explorer map.kmz
- 10\_October Climate Explorer map.kmz
- 11\_November Climate Explorer map.kmz
- 12\_December Climate Explorer map.kmz

Google Earth Pro (used version: 7.3: Web site: <https://www.google.com/earth/>, accessed on 04/01/2020) or equivalent Earth Viewer software is required to visualize the files.

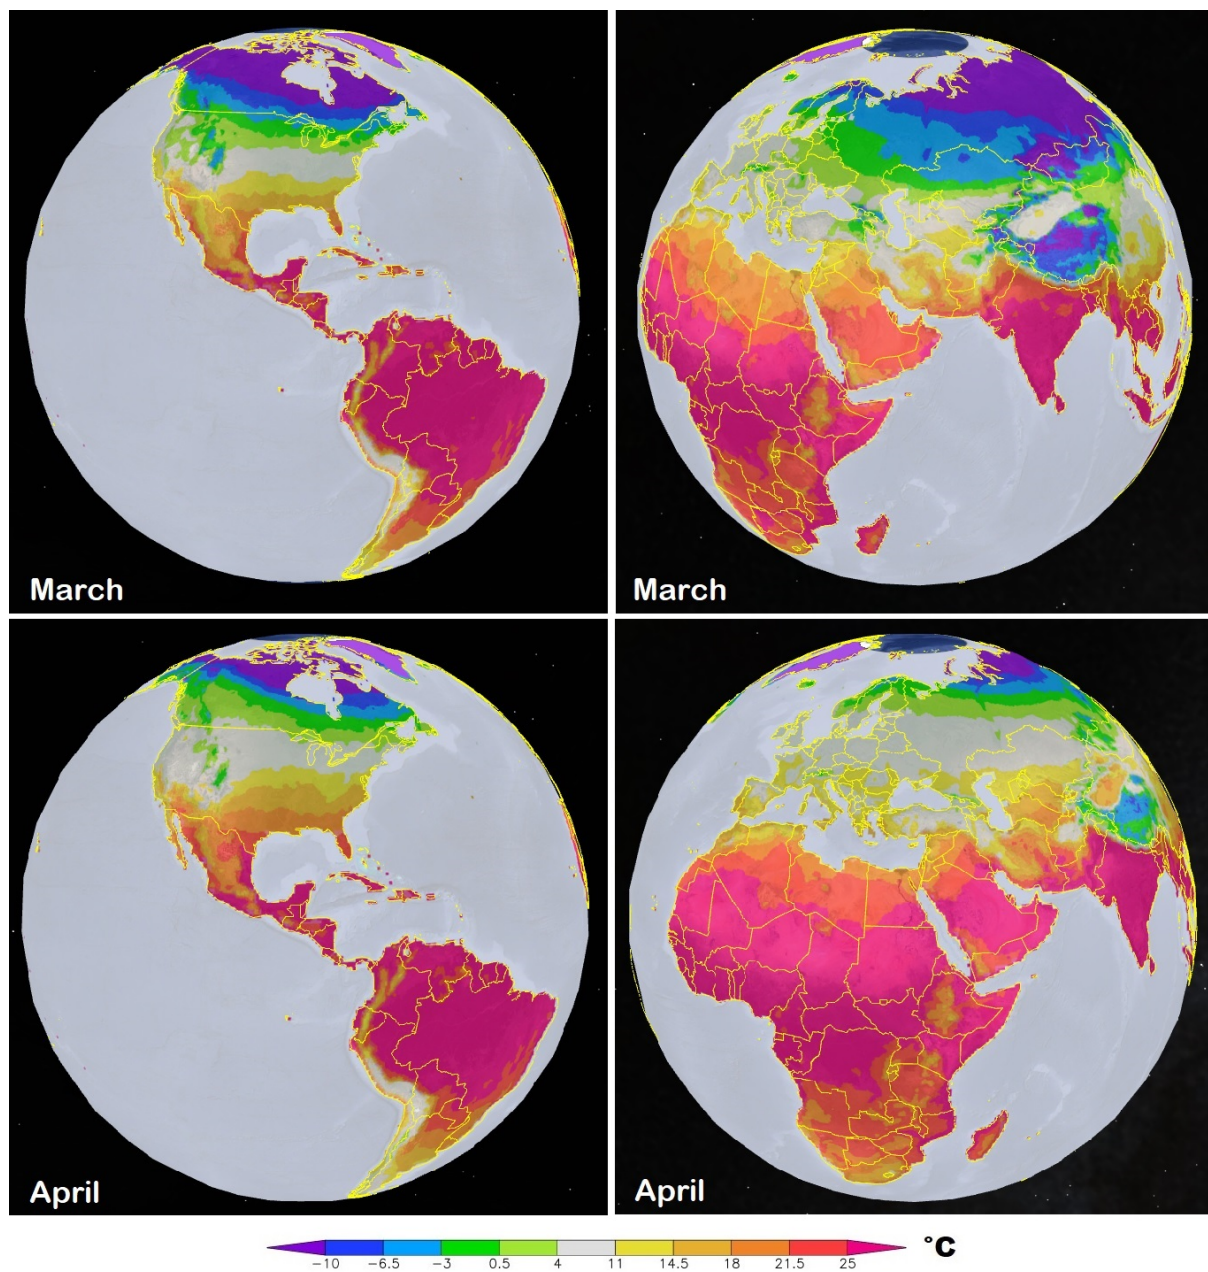

Figure 1: Examples of isotherm Google-Earth-Pro interactive-maps provided as online Supplement Files.
